# Supplementary material for: Cinacalcet and primary hyperparathyroidism: systematic review and meta regression
Source: PubMed Central journal article supplement (PMC7424342; doi:10.1530/ec-20-0221), 2020-07-03
Supplement: supplementary_table_1.pdf [file supplementary_table_1.pdf]

Supplementary Table 1: Search Strategy for Medline

|                  |                                                                                                                                                                                                                      |
|------------------|----------------------------------------------------------------------------------------------------------------------------------------------------------------------------------------------------------------------|
| Hyperparathyroid | *hyperparathyroidism, primary/ or PHPT.tw. or ((primary or tertiary) adj3 (hyperparathyroidism)).tw. or (parathyroid adj3 (adenoma or hyperplasia or carcinoma)).tw. or MEN.tw. or multiple endocrine neoplasia*.tw. |
| Cinacalcet       | exp Cinacalcet/ or (Cinacalcet or R 568 or AMG074 or AMG073 or KRN1493 or calcimimetic).tw.                                                                                                                          |
| NOT              | (Case series or case report).tw. or (animals not humans).sh. or (systematic review or meta).ti.                                                                                                                      |
